# Supplementary material for: Oleosome-Associated Protein of the Oleaginous Diatom Fistulifera solaris Contains an Endoplasmic Reticulum-Targeting Signal Sequence
Source: PubMed Central journal article supplement (PMC4113804; doi:10.3390/md12073892), 2014-06-30
Supplement: marinedrugs-12-03892-s001.pdf [file marinedrugs-12-03892-s001.pdf]

## Supplementary Information

**Figure S1.** DNA sequence neighboring *doap1* gene (*g12504*) on the *Fistulfera* sp. genome. DOAP1-coding region predicted in this study is shown in green. An intron in *doap1* gene is shown in blue. TATA-boxes predicted with GENETIX ver.10 are shown with rectangular boxes. The region supported by RNA-seq data ranges from the closed triangle to the open triangle. The region fused with GFP gene in this study is shown in a red box.

|            |            |            |            |            |             |             |            |             |            |
|------------|------------|------------|------------|------------|-------------|-------------|------------|-------------|------------|
|            | 50         |            | 100        |            |             |             |            |             |            |
| ATGTTCCCTG | GGCATTCTGT | TGTGGTCTT  | CGCGCACGCT | TCGTGGACTG | CCGAAAGCGT  | GGACTTACAC  | GCGGCGGGAC | TGATGGGTGG  | CACGTAAGTA |
|            | 150        |            | 200        |            |             |             |            |             |            |
| TCCAAATCCA | ACCCACAGT  | TGAGTATGGA | GCCAGGTATA | CTCCCATCCG | TTTCATTCAT  | GGACTAAGAG  | TAGGCCAACG | TCCGTTGTCA  | ACTAACTATA |
|            | 250        |            | 300        |            |             |             |            |             |            |
| CTAAATAATG | TTCTAAGCGT | TGCCGGAGTG | GATTGTACAA | AAATGGATCG | TGGGAATATT  | CTTTACGTCG  | GCGCGGAAGA | AAATATTTAGA | AGCACCGGAC |
|            | 350        |            | 400        |            |             |             |            |             |            |
| CGTTTCAACA | TCCGTTCAAC | CGTACACTCG | ATCGATGACG | AAAGTGTGCG | ATACATCGTG  | TTTTTCTCCC  | TCCAAAGATT | CACATTTCTGA | CGGACGAAAC |
|            | 450        |            | 500        |            |             |             |            |             |            |
| GATTAACACA | CAATACGACT | TGGTGGACGT | TGCAAAGTAT | TTGATTCGTA | TTATTTATTT  | GTTTGCAACC  | ATGATGAAAC | TCCTCTTGTAG | CTTTCTTCTT |
|            | 550        |            | 600        |            |             |             |            |             |            |
| CTCTTCTTGA | GCTCCCTCGT | TCAGGCTCAA | GAGTTCAACT | ACCTCGATCC | GACGGTGTGG  | TGGTCCGGGAC | GAACGACCGA | TGACACGGCC  | GCCGGAGTCT |
|            | 650        |            | 700        |            |             |             |            |             |            |
| TGCAGGGCAA | CGGTATCTAC | TTGTCTCCCG | ACAACAAGAT | GATTGTTTCC | ACATCATCGG  | ATGGTACTTT  | GCGAGCCTTT | GAACCAACGA  | CGGGTGCCGT |
|            | 750        |            | 800        |            |             |             |            |             |            |
| CTTGTTGACT | TTTGTCCCG  | AAAATCTCGG | TTTTGCCATT | CGTTGTGGGA | GTGGTGTCCG  | TTTAACTAC   | CGCAGCGCGC | GTCCTTATT   | GGTTATGCGG |
|            | 850        |            | 900        |            |             |             |            |             |            |
| ATTGCGGATG | GTGCTACCGA | CAAGACGAAC | AGTCCCTTGG | CGACGACGTG | AGTACTTTTG  | TTGATGATAA  | TGCTGACGTC | TTTCTTTTC   | TCACTCTCT  |
|            | 950        |            | 1000       |            |             |             |            |             |            |
| TTTCTCGACA | GTCGTGTGAT | TGCCGTCGAC | CCGACGGGTG | CTCTCATCTT | CCAATCGGCT  | TCCTTGCAAG  | GTATTGTGTC | CGGAACCTCC  | GTCACGGACA |
|            | 1050       |            | 1100       |            |             |             |            |             |            |
| GTGACGGAGG | TCACATTCTC | GTTACACACA | ATGTGGATGC | TCTGGAAGGA | TACTTGTCCA  | TCTTTTCGGT  | GGCCGGCTTG | CAACCCGGTG  | CTCCCTCGA  |
|            | 1150       |            | 1200       |            |             |             |            |             |            |
| ACCCATCTTT | TCCGAAACT  | ATTCTGCGCA | AGAAAGCGGT | TCCAACGGTA | CGTCTGCCGT  | GGCCCGTCCC  | TTTTCTCCA  | TTGGTTTCTA  | CCACAATCCC |
|            | 1250       |            | 1300       |            |             |             |            |             |            |
| ACGGCCGGTT | GGTACGACGG | CGGTGCCAAC | AACACCAACG | ACGTCTTCTT | CTTTGCGTGG  | GATACTCCCC  | GCACAGCCAC | ATCGATTGCC  | GAAACGGACG |
|            | 1350       |            | 1400       |            |             |             |            |             |            |
| GTCAAGTCTT | TGTCTTTCAA | TTCCCCATGG | AGTACATGGG | AGACGGCCAG | GGACTCGGAT  | TCGCTCCCAT  | GGGCGTCTG  | ACCGACTTTC  | ACACCACCAC |
|            | 1450       |            | 1500       |            |             |             |            |             |            |
| CGGCCCCGTC | TTGACCAACG | GAGGTCTCAG | CATGTACTGG | ACCGTCTCCA | AGGCTACCAC  | CGACTGTCTAC | CTCGGAGAAG | CCCCCTTGGC  | CCGTACGTAC |
|            | 1550       |            | 1600       |            |             |             |            |             |            |
| TTTTGCGGTG | GCCGCACCGG | TCGTGCCACC | TTTATCGCG  | CCGATCGACC | CGTCCGGCC   | TACCAAGGAC  | CCCGTGCCCA | AGTCACCCTC  | AGCAGTGATC |
|            | 1650       |            | 1700       |            |             |             |            |             |            |
| CCGTCCAACC | GATGGTGTAC | GGTGTCCGGT | CCGCTCCCCA | AATCTGGTCC | ATGTCGTIACG | ATTACAGCAA  | CATGAATGTC | GCCACCACTC  | CCGATCTCGT |
|            | 1750       |            | 1800       |            |             |             |            |             |            |
| GTCTGCGGT  | CTCTTGTGA  | CGAAAGATCA | GCAATACATT | ATTTATGCCA | CACAAGCGAC  | CGTTTCGACG  | GATGGTGGAG | TTCACATGGT  | CCCCGTGGC  |
|            | 1850       |            | 1900       |            |             |             |            |             |            |
| AACTTGGGAC | AGTTGGACTG | GACCGTCAAT | GTCACGGGTG | GTGTCTATGG | TGATATCGCC  | TTGAATGGAC  | GTGGTACCAT | TGTGTATGCG  | GCCGATGTAT |
|            | 1950       |            | 2000       |            |             |             |            |             |            |
| TGGGACAGAT | TTCGGCGTAC | CAGTTTGGTG | AGAACITTTG | CGCGACACCG | GCCCCGACCT  | TGCTCTCCAC  | TTCGGACAGT | ACGTTGGCTC  | CAACATCGGG |
|            | 2050       |            | 2100       |            |             |             |            |             |            |
| TGATGATGGT | GAATCGGATG | TCCCCACTCC | GGCCTTTGGT | ACGATTGTGC | CGACCCCTC   | GGCAGTGGGA  | CCCGAAGACG | GTGAATCTCC  | CGTCTCCAGT |
|            | 2150       |            | 2200       |            |             |             |            |             |            |
| GCTCCGGATG | GTACGACCGT | TCCTCCCGCC | ACGGGACCCA | GTGTTCTCTC | TCCCGTCGAT  | TCGTCTCGG   | CGAACATGGC | CGTAGTGGGT  | ATGGCATCCA |
|            | 2250       |            | 2300       |            |             |             |            |             |            |
| TGTGTGGTGC | ATTGTTCTT  | TAAATCATGT | CGCCGCACAA | TGGCTAAATG | GATAGTATAG  | ACGATATAAT  | ATTGGATGCT | AGAAGAGTCTG | TACGATAGAA |
|            | 2350       |            | 2400       |            |             |             |            |             |            |
| TAACTAGAT  | GTTTGTCTGA | AAAAGTGGT  | GTGTATGCTA | AACCGCCGGG | GAAATAGTGA  | TTTCTCCAAG  | ACTCGTGGTA | ATAGACAATT  | TTTCGTCTTT |
|            | 2450       |            | 2500       |            |             |             |            |             |            |
| GTTCATATGA | TGAATCTAGT | ATTGCGCGCG | GGAGTCGTAC | AATCGAATCA | AATCGTTGCT  | GATTGGAAGA  | TGCATATGTC | ATTGATGAGT  | AGTAGAAAGA |
|            | 2550       |            | 2600       |            |             |             |            |             |            |
| CGAATAGTGG | AAAAGCCAC  | GAACCATGAC | TCTGTTCCGG | AGGACTAGTA | CGACTCTTGG  | TGGTTTCGTC  | TCCTTCCAGC | TCTACTTGAC  | TGGAAGTATC |
|            | 2650       |            | 2700       |            |             |             |            |             |            |
| CGACCACAGA | CTATCGTTGT | TC         |            |            |             |             |            |             |            |

**Figure S2.** Predicted amino acid sequence of DOAP1. The signal sequence predicted with the SignalP program is shown in orange. Quinonprotein alcohol dehydrogenase-like domain (IPR011047) is shown in blue. The region fused with GFP gene in this study is shown in a red box.

|             |             |            |            |             |
|-------------|-------------|------------|------------|-------------|
| 10          | 20          | 30         | 40         | 50          |
| MMKLSLSFLL  | LEFLSSLVQAQ | EFNYLDPTVL | WSGRTTDDTA | AGVLQGNNGIY |
| 60          | 70          | 80         | 90         | 100         |
| LSPDNKMIIVS | TSSDGTTLRAF | EPTTGAVLWT | FVPENLGFAL | RCWSGVTFNY  |
| 110         | 120         | 130        | 140        | 150         |
| RSARPYLVYA  | IADGATDKTN  | SPLATTRVIA | VDPTGALIFQ | SASLQGIAAG  |
| 160         | 170         | 180        | 190        | 200         |
| TPVTDSDGGH  | ILVTHNVDAL  | EGYLSIFSVA | GLQPGAPLEP | IFSENYSSQE  |
| 210         | 220         | 230        | 240        | 250         |
| SGSNGTVAVA  | RPFSPIGFYH  | NPTAGWYDGG | ANNTNDVFFF | AWDTPRTATS  |
| 260         | 270         | 280        | 290        | 300         |
| IAETDGQVVF  | FQFPMEYMGD  | GQGLGFAPMG | SRTDFHTTTG | PVLTNGGLSM  |
| 310         | 320         | 330        | 340        | 350         |
| YWTVSKATTD  | CYLGEAPLAR  | TYFSRGRTR  | ATFDRADRPA | PAYQGPRAQV  |
| 360         | 370         | 380        | 390        | 400         |
| TLSSDPVQPM  | VYGVGAAPQI  | WSMSYDYSNM | NVATTPDLVS | SRLLLTQDQQ  |
| 410         | 420         | 430        | 440        | 450         |
| YIIYATQATV  | STDGGVHMVP  | VGNLGQLDWT | VNVTGGVYGD | IALNGRGTIV  |
| 460         | 470         | 480        | 490        | 500         |
| YAADVLGQIS  | AYQFGENFAA  | TPAPTLSPTS | DSTLAPTSGD | DGESDVPTPA  |
| 510         | 520         | 530        | 540        | 550         |
| FGTIVPTPSG  | SGPEDGESPA  | PSAPDGTTVP | PATGPSVPPP | VDSSSANMAV  |
| 560         |             |            |            |             |
| VGMASMLLAL  | VL          |            |            |             |

**Figure S3.** Western blotting signals derived from GFP (a) and S<sub>DOAP1</sub>-GFP (b) were plotted with red lines. Molecular marker signals at the neighboring lanes were also plotted with blue lines. For better comparison between (a) and (b), each marker position is marked with gray column.

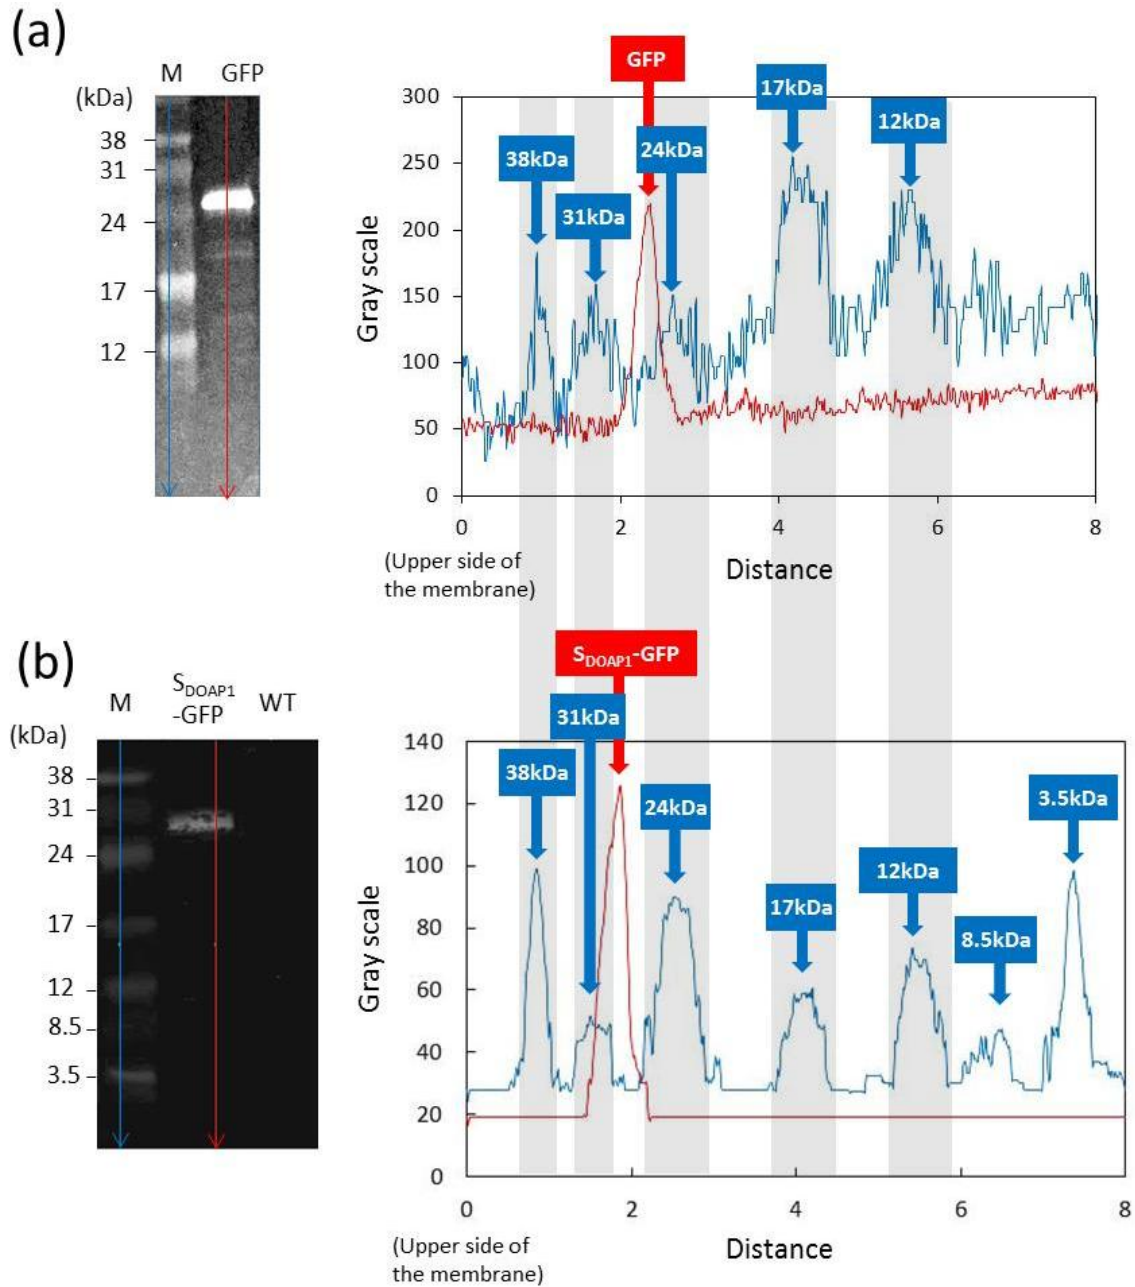

**Figure S4.** Examples of fluorescence profiling on the microscopic images of *Fistulifera* sp. JPCC DA0580 expressing  $S_{DOAP1}$ -GFP. Fluorescent signals of GFP and chlorophyll along the white arrows in the images are shown in green and red lines, respectively. Fluorescent peaks of GFP outside of the chlorophyll fluorescent region are shown with the black arrows. (scale bar = 5  $\mu$ m).

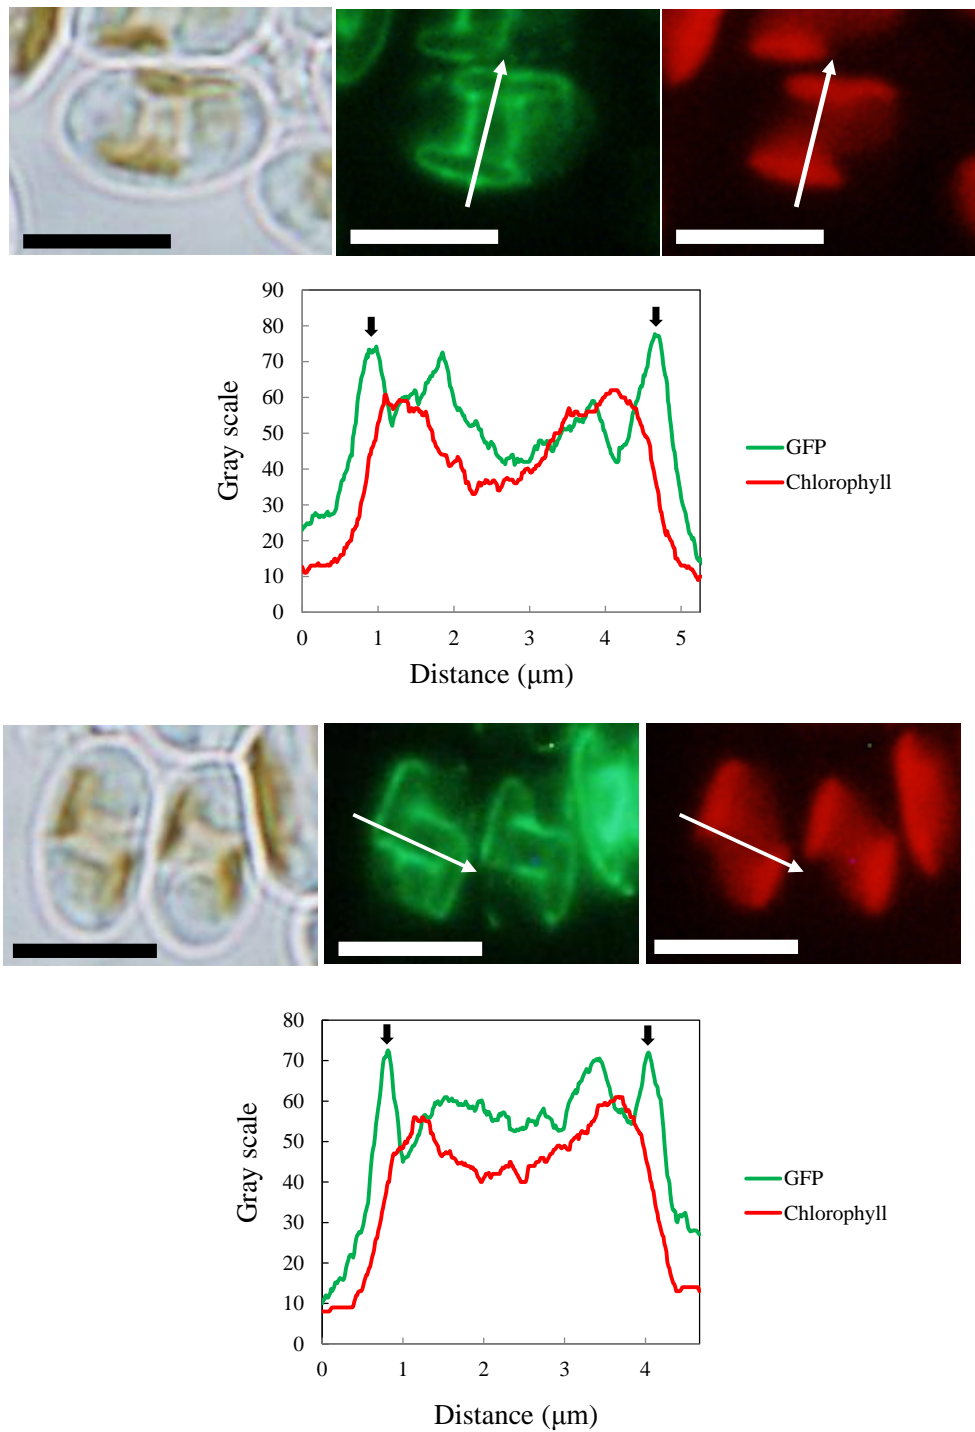

**Figure S5.** Microscopic observation on *Fistulifera* sp. JPCC DA0580 transformants expressing SDOAP1-GFP with Hoechst 33342 staining. Hoechst staining was conducted by adding Hoechst 33342 (Invitrogen, Eugene, OR, USA) to the cell culture at 1:50 volume ratio (final concentration = 200  $\mu\text{g}/\text{mL}$ ) (scale bar = 5  $\mu\text{m}$ ).

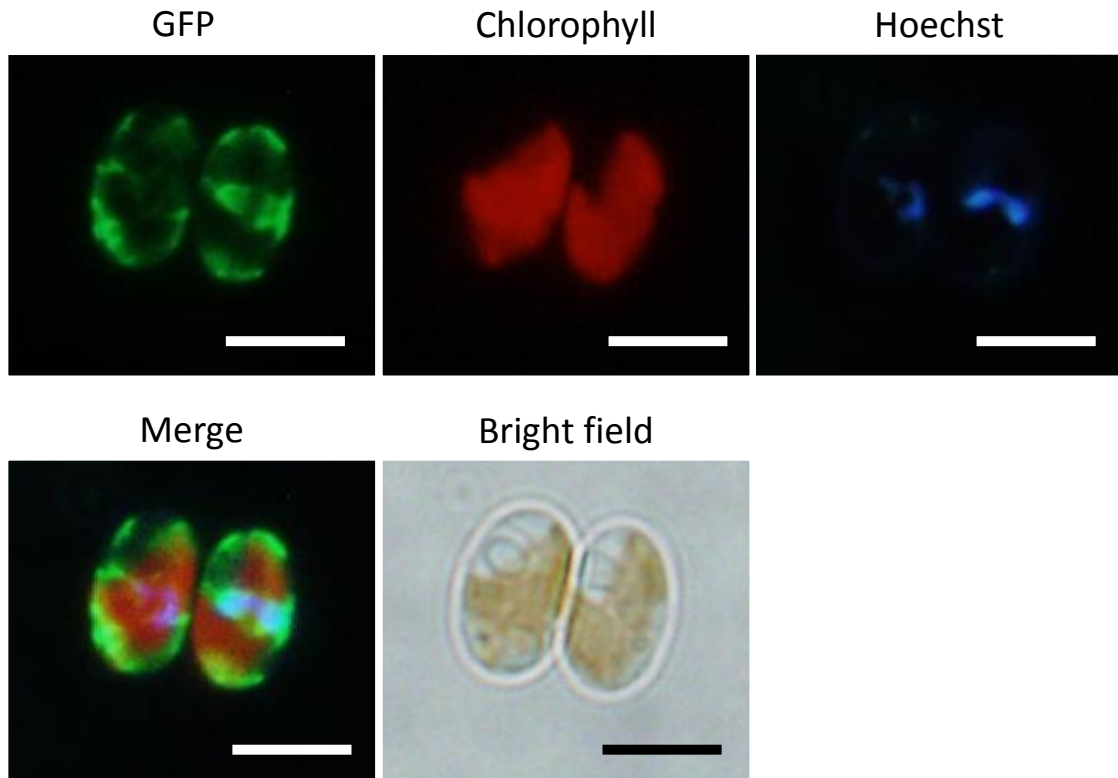

**Figure S6.** X-Y plane sequence images generated from the reconstructed 3D-images of Figure 3 in the main text (scale bar = 1.3  $\mu\text{m}$ ).

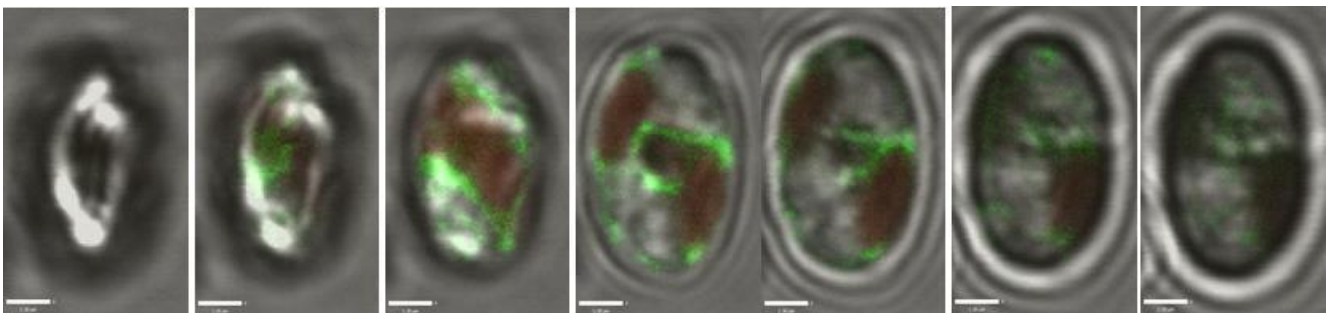

**Figure S7.** Confocal microscopic images of *Fistulifera* sp. JPCC DA0580 stained with ER-Tracker™ Green (Life Technologies). The cells ( $1 \times 10^7$  cells/mL) were incubated with  $0.78 \mu\text{g/mL}$  of ER-Tracker™ Green in phosphate buffered saline for 30 min.

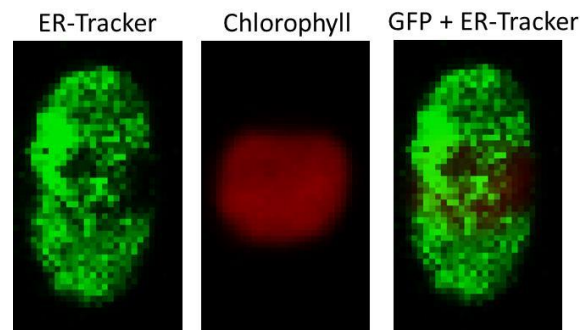

© 2014 by the authors; licensee MDPI, Basel, Switzerland. This article is an open access article distributed under the terms and conditions of the Creative Commons Attribution license (<http://creativecommons.org/licenses/by/3.0/>).
